# Supplementary material for: Integrated analyses of multi-omics reveal global patterns of methylation and hydroxymethylation and screen the tumor suppressive roles of HADHB in colorectal cancer
Source: PubMed Central journal article supplement (PMC5833094; doi:10.1186/s13148-018-0458-3), 2018-03-02

**2504588 MeDIP**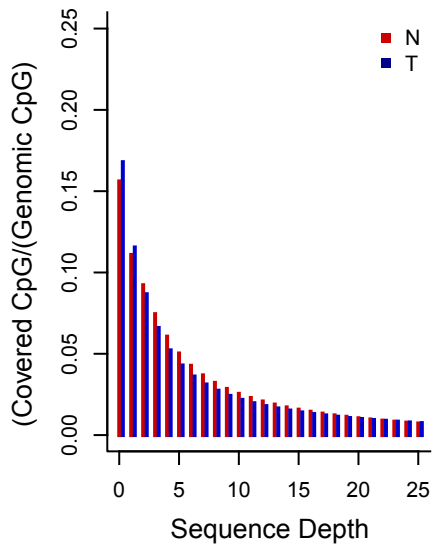**2512618 MeDIP**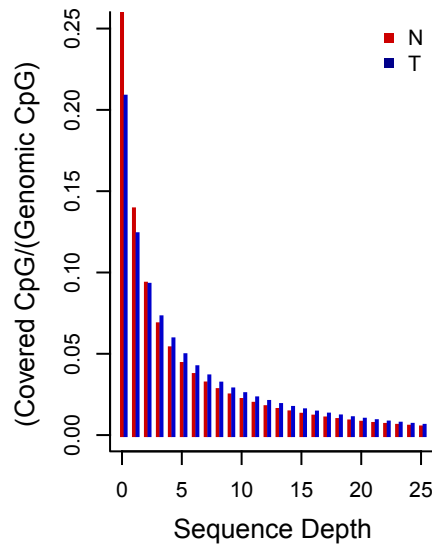**2539382 MeDIP**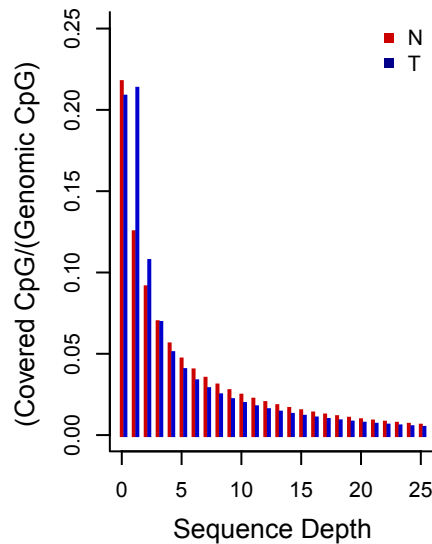**2551349 MeDIP**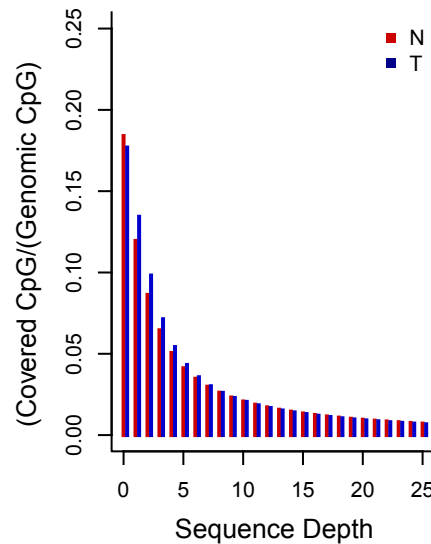**2553763 MeDIP**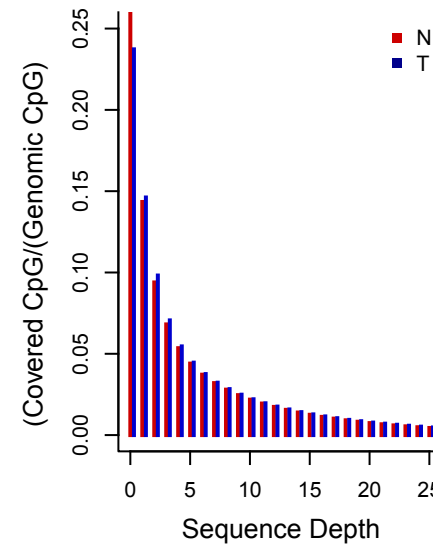**S12 MeDIP**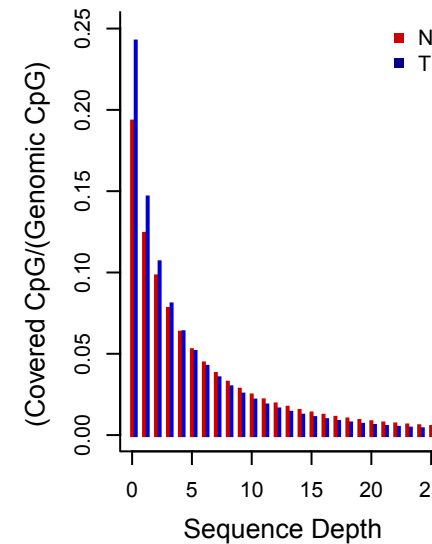**2504588 hMeDIP**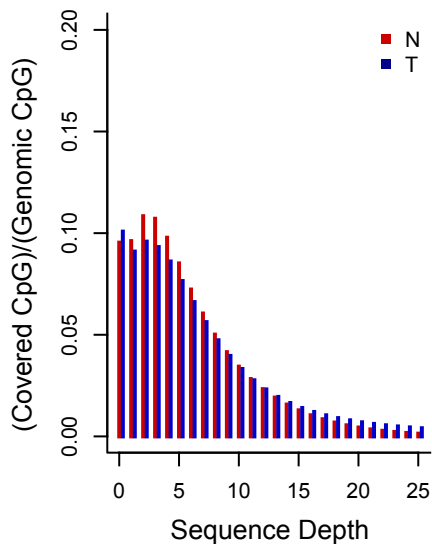**2512618 hMeDIP**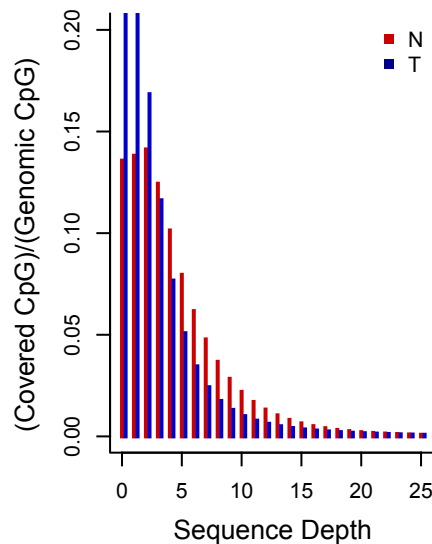**2539382 hMeDIP**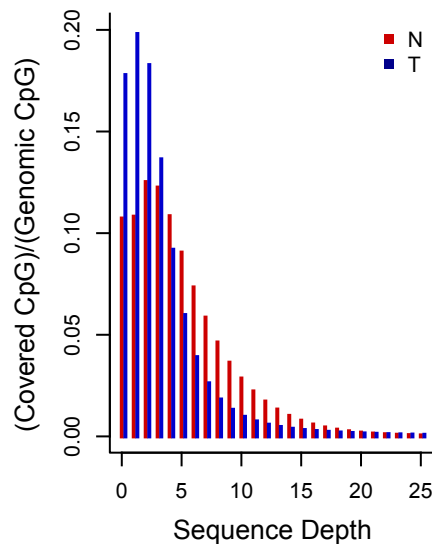**2551349 hMeDIP**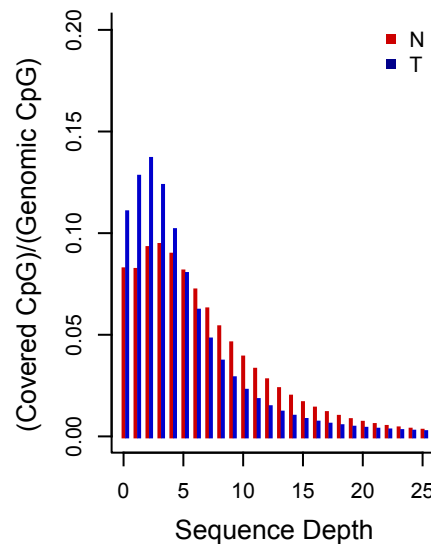**2553763 hMeDIP**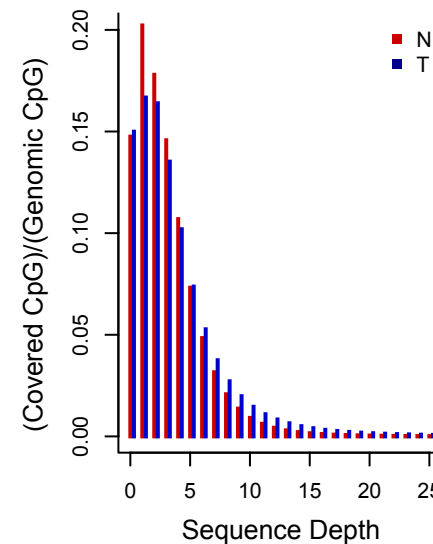**S12 hMeDIP**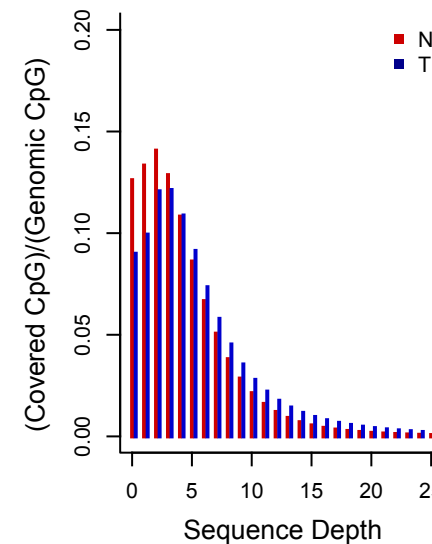

Supplement: 13148_2018_458_MOESM2_ESM.pdf [file 13148_2018_458_MOESM2_ESM.pdf]
