# Supplementary material for: Integrated analyses of multi-omics reveal global patterns of methylation and hydroxymethylation and screen the tumor suppressive roles of HADHB in colorectal cancer
Source: PubMed Central journal article supplement (PMC5833094; doi:10.1186/s13148-018-0458-3), 2018-03-02

**Medip**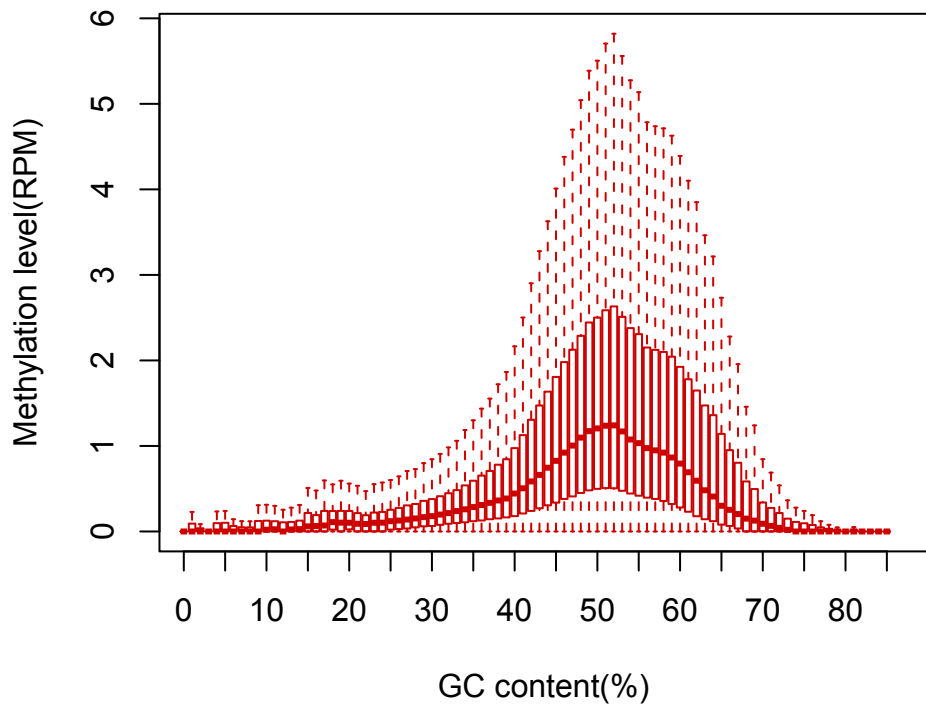**hMedip**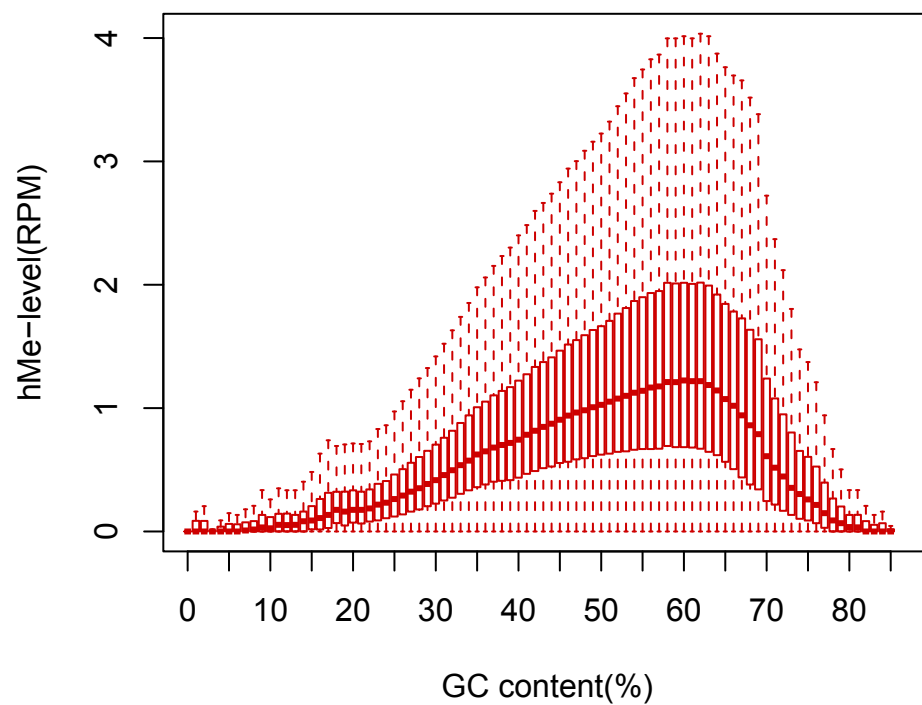**Medip**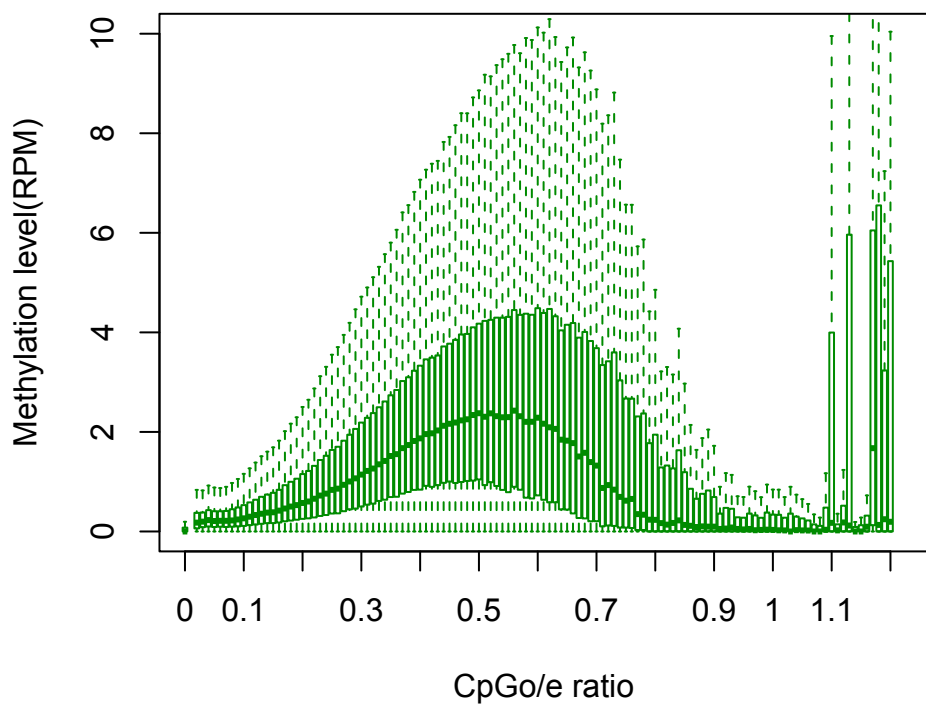**hMedip**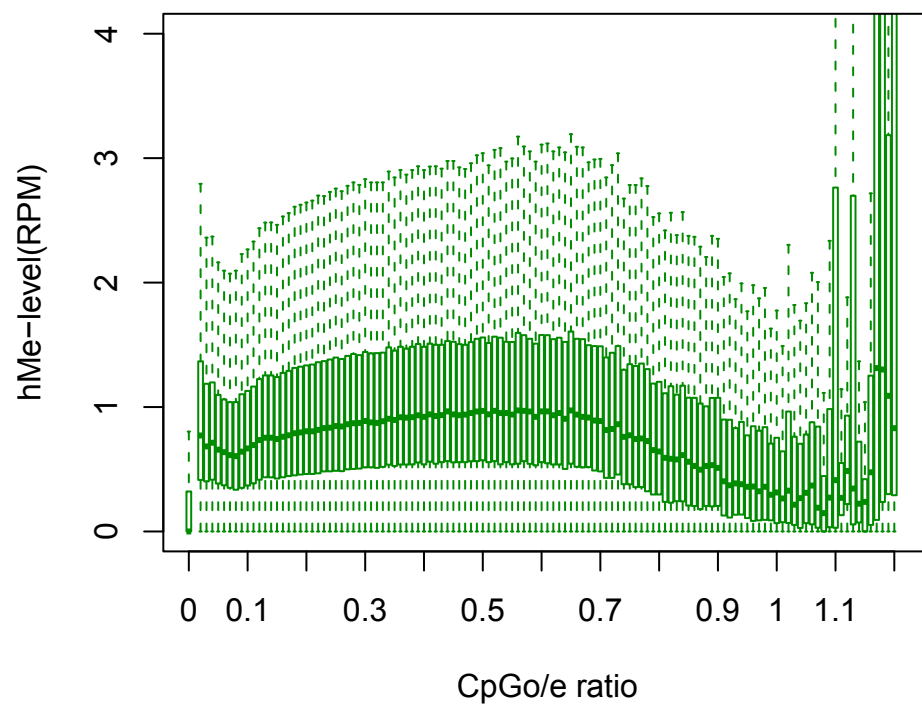

Supplement: 13148_2018_458_MOESM3_ESM.pdf [file 13148_2018_458_MOESM3_ESM.pdf]
