# Supplementary material for: Integrated analyses of multi-omics reveal global patterns of methylation and hydroxymethylation and screen the tumor suppressive roles of HADHB in colorectal cancer
Source: PubMed Central journal article supplement (PMC5833094; doi:10.1186/s13148-018-0458-3), 2018-03-02

MAPK signaling pathway (95)  
 Endocytosis (90)  
 Regulation of actin cytoskeleton (85)  
 Huntington's disease (78)  
 Chemokine signaling pathway (77)  
 Protein processing endoplasmic reticulum (77)  
 ...[117]

Cell adhesion molecules(CAMs) (12)  
 Bile secretion (8)  
 Taste transduction (6)  
 Primary immunodeficiency (5)  
 Butirosin and neomycin biosynthesis (3)

Pathways in cancer (165)  
 Neuroactive ligand-receptor interaction (107)  
 Cytokine-cytokine receptor interaction (105)  
 Focal adhesion (96)  
 Tight junction (84)  
 Toxoplasmosis (75)  
 Chagas disease (73)  
 Wnt signaling pathway (72)  
 Calcium signaling pathway (71)  
 Hepatitis C (67)  
 ...[40]

Metabolic pathway (585)  
 Purine metabolism (98)  
 Axon guidance (81)

Cell cycle (19)  
 RNA transport (15)  
 Ribosome biogenesis in eukaryotes (14)  
 Oocyte meiosis (13)  
 Pyrimidine metabolism (13)  
 Ribosome (13)  
 Progesterone-mediated oocyte maturation (10)  
 DNA replication (7)  
 Homologous recombination (5)

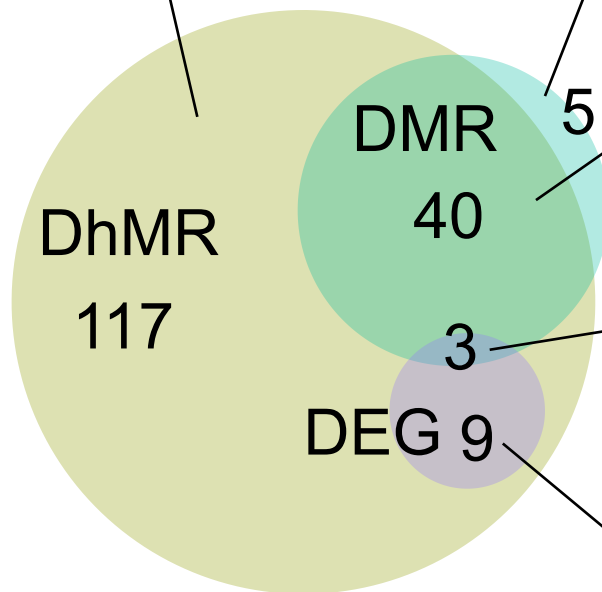

Supplement: 13148_2018_458_MOESM8_ESM.pdf [file 13148_2018_458_MOESM8_ESM.pdf]
